# Supplementary material for: Sequential Release of Paclitaxel and Imatinib from Core–Shell Microparticles Prepared by Coaxial Electrospray for Vaginal Therapy of Cervical Cancer
Source: MDPI journal article supplement (doi:10.3390/ijms22168760), 2021-08-16
Supplement: s1 [file s1]

**Sequential release of paclitaxel and imatinib from core-shell microparticles prepared by coaxial electrospray for vaginal therapy of cervical cancer**

Zhepeng Liu<sup>a\*</sup>, Haini Chen<sup>a</sup>, Fengmei Lv<sup>a</sup>, Jun Wang<sup>a,b</sup>, Shoujin Zhao<sup>a</sup>, Yijun Li<sup>a</sup>, Xuexin Xue<sup>a</sup>, Yu Liu<sup>b\*</sup>, Gang Wei<sup>b</sup>, Weiyue Lu<sup>b</sup>

<sup>a</sup>*School of Medical Instrument and Food Engineering, University of Shanghai for Science and Technology, Shanghai 200093, China*

<sup>b</sup>*Department of Pharmaceutics, School of Pharmacy, Fudan University & Key Laboratory of Smart Drug Delivery (Fudan University), Shanghai 201203, China*

Table S1. Gradient elution for HPLC analysis

| Time (min) | Mobile phase A (per cent V/V) | Mobile phase B (per cent V/V) |
|------------|-------------------------------|-------------------------------|
| 0-5        | 100                           | 0                             |
| 5-15       | 70                            | 30                            |
| 15-23      | 100                           | 0                             |

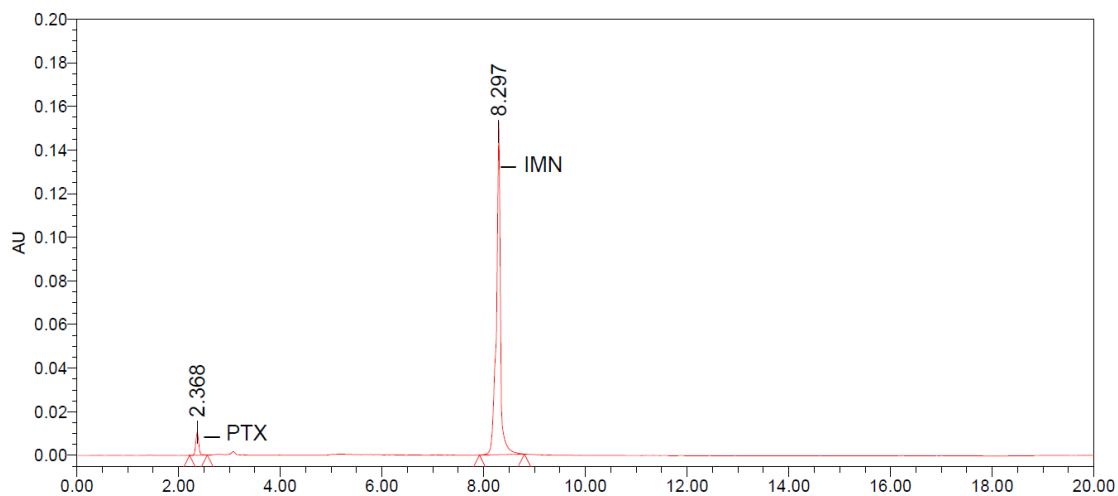

Fig.S1 The HPLC of PTX and IMN.

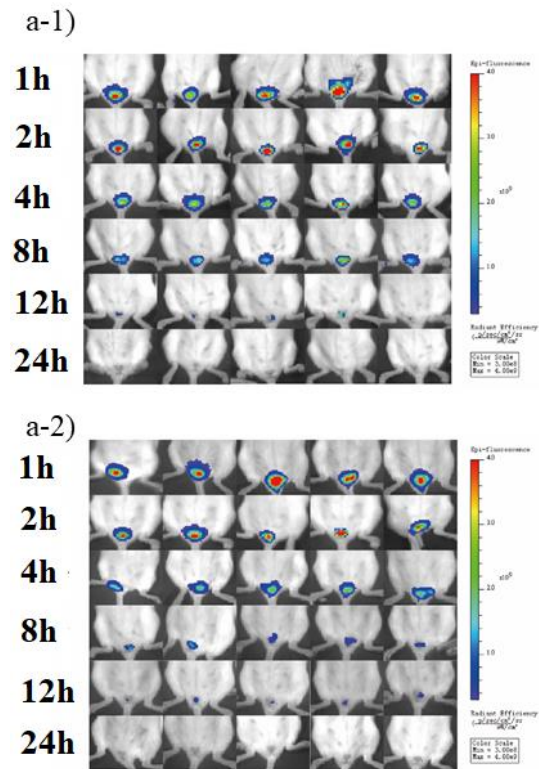

Fig.S2 The fluorescence comparison of PHIPMP and IPNP in vaginal at 1, 2, 4, 8 and 12 hours (a-1. PHIPMP; a-2. IPNP).

a) the 4<sup>th</sup> day

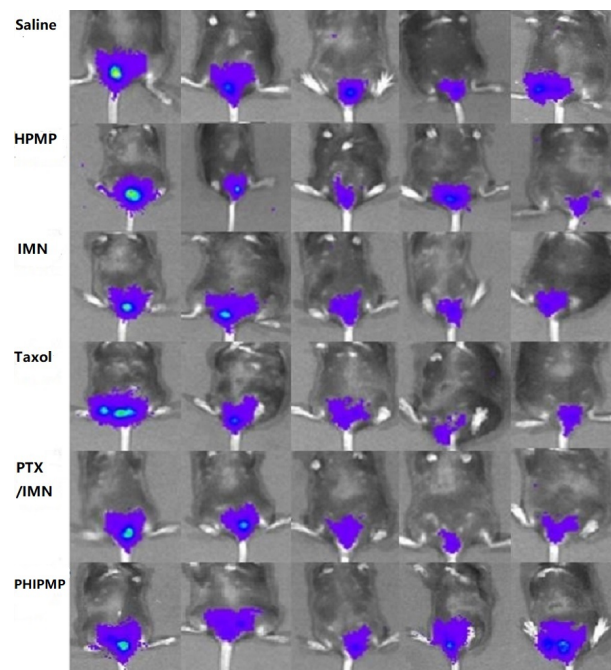

b) the 14<sup>th</sup> day

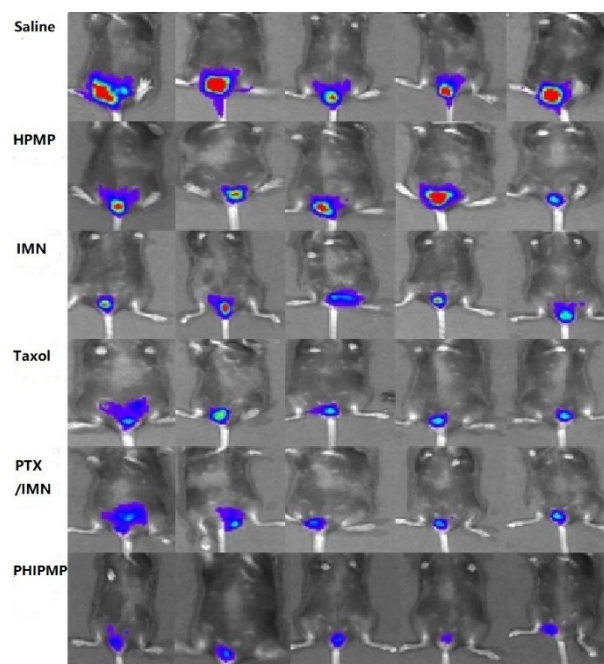

c) the 25<sup>th</sup> day

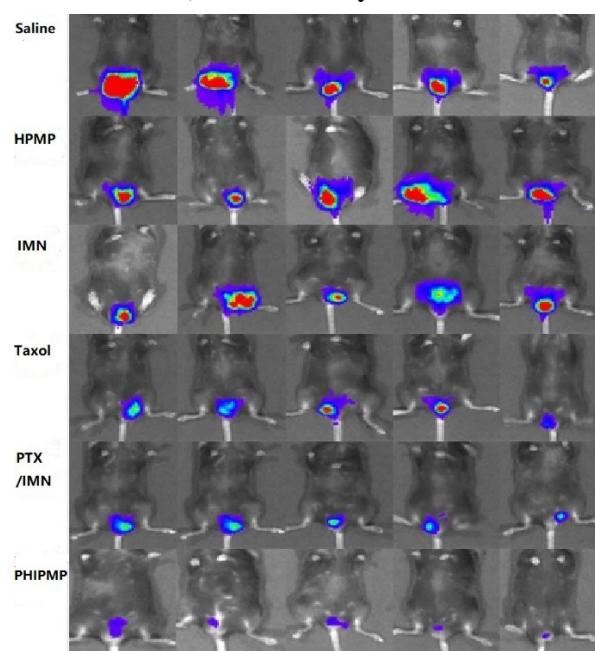

Fig.S3 The bioluminescence intensity imaging of PHIPMP, PTX/IMN physical mixture solution, Taxol, IMN solution, HPMP and saline group to the tumor-bearing mice at the 4<sup>th</sup>, 14<sup>th</sup> and 25<sup>th</sup> day (n=5).

a)

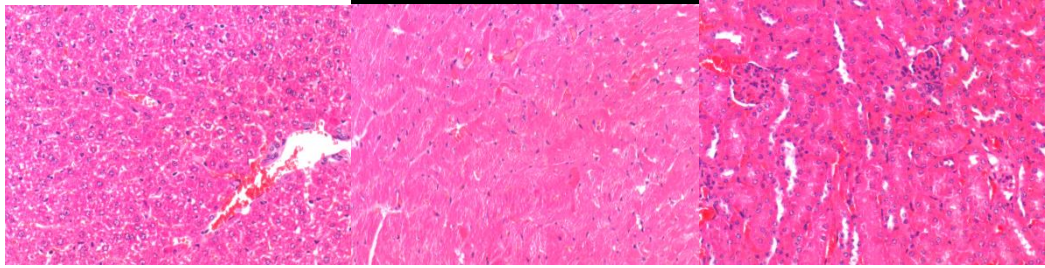

liver

heart

kidney

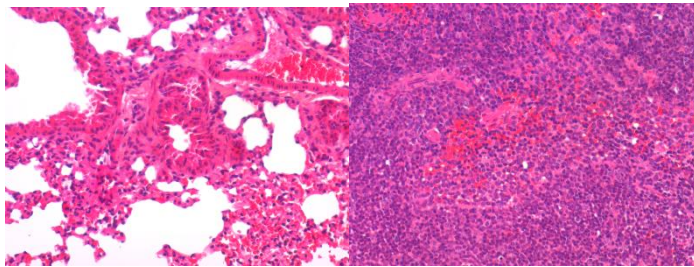

lung

spleen

b)

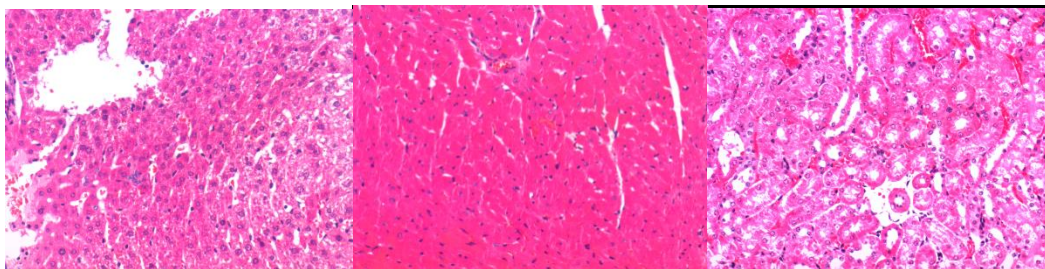

liver

heart

kidney

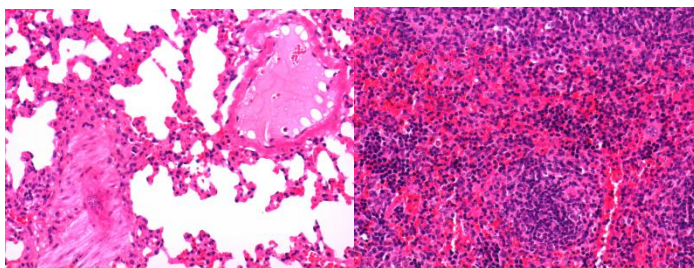

lung

spleen

Fig. S4 Tissues stained with H&E of liver, heart, kidney, lung and spleen (a. PHIPMP; b.saline)
